# Supplementary material
Source: Springer Nature journal article supplement (https://www.springermedizin.de/resource/supplementary/12882_2014_829_MOESM1_ESM.pdf/9454394)
Supplement: MOESM1 [file 9454394]

NHANES 1999-2004  
participants  
(n=31,127)

Excluded

Age < 20 years (n=15795)  
Pregnant (n=175)  
Estimated GFR < 15  
(n=1989)  
Missing dietary records  
(n=875)

Study  
cohort  
(n=12293)
